# Supplementary material
Source: PubMed Central journal article supplement (PMC4703328)
Supplement: NIHMS736517-supplement-2.pdf [file NIHMS736517-supplement-2.pdf]

**Supplementary Table 1**

| Gene                      | Tissue      | Contralateral | Ipsilateral | Fold increase |
|---------------------------|-------------|---------------|-------------|---------------|
| <i>Csf1</i>               | DRG         | 11.02         | 63.14       | 63.14         |
| <i>Il-34<sup>a</sup></i>  | DRG         | 10.92         | 14.43       | 1.32          |
| <i>Ccl21a<sup>a</sup></i> | DRG         | 1.66          | 1.85        | 1.11          |
| <i>Ccl21b<sup>a</sup></i> | DRG         | 4.7           | 3.28        | 0.7           |
| <i>Ccl21c<sup>a</sup></i> | DRG         | 0             | 0           | --            |
| <i>Csf1r<sup>b</sup></i>  | Dorsal Cord | 16.72         | 60.97       | 3.65          |
| <i>Tyrobp</i>             | Dorsal Cord | 9.29          | 38.03       | 4.09          |
| <i>Cx3cr1<sup>b</sup></i> | Dorsal Cord | 12.65         | 36.61       | 2.89          |
| <i>Trem1<sup>c</sup></i>  | Dorsal Cord | 0             | 0           | --            |
| <i>Trem3<sup>c</sup></i>  | Dorsal Cord | 0             | 0.07        | --            |
| <i>Ccr7<sup>d</sup></i>   | Dorsal Cord | 0             | 0           | --            |
| <i>Cxcr3<sup>d</sup></i>  | Dorsal Cord | 0             | 0           | --            |
| <i>Cd200<sup>e</sup></i>  | DRG         | 40.76         | 56.92       | 1.40          |
| <i>Cd22<sup>e</sup></i>   | DRG         | 0.08          | 0.11        | 1.38          |
| <i>Cd47<sup>e</sup></i>   | DRG         | 43.72         | 42.53       | 0.97          |
| <i>Hspd1<sup>e</sup></i>  | DRG         | 166.02        | 155.70      | 0.94          |
| <i>Icam5<sup>e</sup></i>  | DRG         | 0.27          | 0.40        | 1.48          |

**Supplementary Table 1. RNA-Seq analysis of DRG and dorsal cord after peripheral nerve injury.** Relative expression levels (Fragments Per Kilobase of exon per Million mapped fragments: FPKM) for selected genes in the DRG and dorsal spinal cord 7d after nerve injury.

<sup>a</sup>Genes not upregulated in DRG after nerve injury; <sup>b</sup>Genes predominately expressed in microglia; <sup>c</sup>Genes exclusively expressed in monocytes; <sup>d</sup>CCL21 receptors; <sup>e</sup>Genes encoding neuronal membrane proteins that reportedly counteract microglia activation
