# Supplementary material
Source: PubMed Central journal article supplement (PMC4703328)
Supplement: NIHMS736517-supplement-3.pdf [file NIHMS736517-supplement-3.pdf]

Corresponding Author: Zhonghui Guan, Allan Basbaum

Manuscript Number: NN-A52260

Manuscript Type: Article

# Main Figures: 8

# Supplementary Figures: 13

# Supplementary Tables: 1

# Supplementary Videos:

## Reporting Checklist for Nature Neuroscience

This checklist is used to ensure good reporting standards and to improve the reproducibility of published results. For more information, please read [Reporting Life Sciences Research](#).

Please note that in the event of publication, it is mandatory that authors include all relevant methodological and statistical information in the manuscript.

### Statistics reporting, by figure

- Please specify the following information for each panel reporting quantitative data, and where each item is reported (section, e.g. Results, & paragraph number).
- Each figure legend should ideally contain an exact sample size (n) for each experimental group/condition, where n is an exact number and not a range, a clear definition of how n is defined (for example x cells from x slices from x animals from x litters, collected over x days), a description of the statistical test used, the results of the tests, any descriptive statistics and clearly defined error bars if applicable.
- For any experiments using custom statistics, please indicate the test used and stats obtained for each experiment.
- Each figure legend should include a statement of how many times the experiment shown was replicated in the lab; the details of sample collection should be sufficiently clear so that the replicability of the experiment is obvious to the reader.
- For experiments reported in the text but not in the figures, please use the paragraph number instead of the figure number.

**Note:** Mean and standard deviation are not appropriate on small samples, and plotting independent data points is usually more informative. When technical replicates are reported, error and significance measures reflect the experimental variability and not the variability of the biological process; it is misleading not to state this clearly.

|         | TEST USED       |                 | n                     |              |                                    | DESCRIPTIVE STATS (AVERAGE, VARIANCE) |                             | P VALUE               |             | DEGREES OF FREEDOM & F/t/z/R/ETC VALUE |                 |                       |
|---------|-----------------|-----------------|-----------------------|--------------|------------------------------------|---------------------------------------|-----------------------------|-----------------------|-------------|----------------------------------------|-----------------|-----------------------|
|         | FIGURE NUMBER   | WHICH TEST?     | SECTION & PARAGRAPH # | EXACT VALUE  | DEFINED?                           | SECTION & PARAGRAPH #                 | REPORTED?                   | SECTION & PARAGRAPH # | EXACT VALUE | SECTION & PARAGRAPH #                  | VALUE           | SECTION & PARAGRAPH # |
| example | 1a              | one-way ANOVA   | Fig. legend           | 9, 9, 10, 15 | mice from at least 3 litters/group | Methods para 8                        | error bars are mean +/- SEM | Fig. legend           | p = 0.044   | Fig. legend                            | F(3, 36) = 2.97 | Fig. legend           |
| example | results, para 6 | unpaired t-test | Results para 6        | 15           | slices from 10 mice                | Results para 6                        | error bars are mean +/- SEM | Results para 6        | p = 0.0006  | Results para 6                         | t(28) = 2.808   | Results para 6        |

|                  |                       | TEST USED                           |                | n                        |                                                   |                        | DESCRIPTIVE STATS<br>(AVERAGE, VARIANCE) |                        | P VALUE                                         |                                  | DEGREES OF<br>FREEDOM &<br>F/t/z/R/ETC VALUE             |                                  |
|------------------|-----------------------|-------------------------------------|----------------|--------------------------|---------------------------------------------------|------------------------|------------------------------------------|------------------------|-------------------------------------------------|----------------------------------|----------------------------------------------------------|----------------------------------|
| FIGURE<br>NUMBER | WHICH TEST?           | SECTION &<br>PARAGRAPH #            | EXACT<br>VALUE | DEFINED?                 | SECTION &<br>PARAGRAPH #                          | REPORTED?              | SECTION &<br>PARAGRAPH #                 | EXACT VALUE            | SECTION &<br>PARAGRAPH #                        | VALUE                            | SECTION &<br>PARAGRAPH #                                 |                                  |
| +<br>-           | 1b                    | two-way ANOVA, Tukey's posthoc test | Meth para 10   | 5, 3, 3, 5               | mice/time point, 3 replicates for each mRNA       | Figure legend          | error bars are mean +/- SEM media        | Meth para 10           | P < 0.0001 (injury)                             | Will add to the legend if needed | F (1, 12) = 73.11                                        | Will add to the legend if needed |
| +<br>-           | 1c                    | two-way ANOVA, Tukey's posthoc test | Meth para 10   | 3, 3, 3, 3               | mice/time point, 3 replicates for each mRNA       | Figure legend          | error bars are mean +/- SEM              | Meth para 10           | P = 0.629 (injury)                              | Will add to the legend if needed | F (1, 16) = 0.2417                                       | Will add to the legend if needed |
| +<br>-           | 1d                    | two-way ANOVA, Tukey's posthoc test | Meth para 10   | 3, 3, 3, 3               | mice/time point, 3 replicates for mRNA            | Figure legend          | error bars are mean +/- SEM              | Meth para 10           | P < 0.0001 (injury)                             | Will add to the legend if needed | F (1, 16) = 31.05                                        | Will add to the legend if needed |
|                  | Supplementary Fig. 2e | unpaired t-test                     | Meth para 10   | 3                        | mice                                              | Figure legend          | error bars are mean +/- SEM              | Meth para 10           | P=0.0166                                        | Will add to the legend if needed | t=3.962                                                  | Will add to the legend if needed |
|                  | Supplementary Fig. 2f | unpaired t-test                     | Meth para 10   | 4                        | mice                                              | Figure legend          | error bars are mean +/- SEM              | Meth para 10           | P=0.0005                                        | Will add to the legend if needed | t=6.883                                                  | Will add to the legend if needed |
|                  | Supplementary Fig. 3a | unpaired t-test                     | Meth para 10   | 3                        | mice/genotype                                     | Figure legend          | error bars are mean +/- SEM              | Meth para 10           | P=0.0101                                        | Will add to the legend if needed | t=4.585                                                  | Will add to the legend if needed |
|                  | Supplementary Fig. 3b | unpaired t-test                     | Meth para 10   | 3                        | mice/treatment                                    | Figure legend          | error bars are mean +/- SEM              | Meth para 10           | P=0.0050                                        | Will add to the legend if needed | t=5.612                                                  | Will add to the legend if needed |
| +<br>-           | 4a                    | two-way ANOVA, Tukey's posthoc test | Meth para 10   | 6, 5                     | 6 and 5 mice per genotype, tested on several days | Figure legend          | error bars are mean +/- SEM              | Meth para 10           | p < 0.0001 (genotype)                           | Will add to the legend if needed | F (1, 9) = 79.74                                         | Will add to the legend if needed |
|                  | 4b                    | two-way ANOVA, Tukey's posthoc test | Meth para 10   | 7, 7                     | 7 mice per group tested at different time points  | Figure legend          | Box-and-Whiskers (min/max), median       | Meth para 10           | P<0.0001 (saline/CSF1)<br>p=0.0001 (time)       | Will add to the legend if needed | F(1,12) = 235.2 (saline/CSF1)<br>F(1, 12) = 31.09 (time) | Will add to the legend if needed |
|                  | 4c                    | two-way ANOVA, Tukey's posthoc test | Meth para 10   | 6,4                      | Mice/genotype tested before and after injection   | Figure legend          | Box-and-Whiskers (min/max), median       | Meth para 10           | P<0.0001 (baseline/CSF1)<br>P=0.8772 (genotype) | Will add to the legend if needed | F(1,8)=74.43 (baseline/CSF1)<br>F(1,8)=0.02546           | Will add to the legend if needed |
|                  | 4d                    | two-way ANOVA                       | Meth para 10   | 6/6                      | Mice pre genotype at different time points        | Figure legends         | Box-and-Whiskers (min/max), median       | Meth para 10           | P=0.1332 (genotype)<br>P<0.0001 (time)          | Will add to the legend if needed | F(1,20)=2.450 (genotype)<br>F(1,20)= 105.6 (time)        | Will add to the legend if needed |
| +<br>-           | 4e                    | multiple t-tests                    | Meth para 10   | 4, 5, 7, 8               | mice, 3 replicates for each mRNA                  | Will add to the legend | error bars are mean +/- SEM              | Fig. leg, Meth para 10 | P=0.0098<br>P=0.004<br>P=0.009<br>P=0.001       | Will add to the legend if needed | t=3.71<br>t=3.95<br>t=3.08<br>t=3.94                     | Will add to the legend if needed |
| +<br>-           | 4f                    | multiple t-tests                    | Meth para 10   | 3/4<br>3/4<br>3/4<br>3/3 | mice, 3 replicates for each mRNA                  | Figure legend          | error bars are mean +/- SEM              | Fig. leg, Meth para 10 | P= 0.0003<br>P=0.003<br>P=0.005<br>P=0.02       | Will add to the legend if needed | t=11.24<br>t=5.32<br>t=4.76<br>t=3.33                    | Will add to the legend if needed |

| mentary Fig. 4a       | ANOVA, Tukey's posthoc test            | para 10         |                          | tested on different time points                    | legend                 | +/- SEM                            | legend Meth para 10        | (time) P<0.0001 (genotype)                 | to figure legend if needed          | (time) F(1,7)=137.0                                  | to the legend if needed             |
|-----------------------|----------------------------------------|-----------------|--------------------------|----------------------------------------------------|------------------------|------------------------------------|----------------------------|--------------------------------------------|-------------------------------------|------------------------------------------------------|-------------------------------------|
| Supplementary Fig. 4b | unpaired t-test                        | Meth para 10    | 7/7                      | Mice per genotype                                  | Figure legend          | Box-and-Whiskers (min/max), median | Figure legend Meth para 10 | P=0.9136                                   | Will add to figure legend if needed | t=0.1108                                             | Will add to figure legend if needed |
| Supplementary Fig. 4c | unpaired t-test                        | Meth para 10    | 7/7                      | Mice per genotype                                  | Figure legend          | Box-and-Whiskers (min/max), median | Figure legend Meth para 10 | P=0.7646                                   | Will add to figure legend if needed | t=0.3063                                             | Will add to figure legend if needed |
| Supplementary Fig. 4d | two-way ANOVA, Tukey's posthoc test    | Meth para 10    | 7/7                      | Mice per genotype at different temperatures        | Figure legend          | Box-and-Whiskers (min/max), median | Figure legend Meth para 10 | P<0.0001 (temperature) p=0.1762 (genotype) | Will add to figure legend if needed | F(2,24)=99.43 (temperature) F(1,12)=2.066 (genotype) | Will add to figure legend if needed |
| Supplementary Fig. 4e | unpaired t-test                        | Meth para 10    | 6/6                      | Mice per genotype                                  | Figure legend          | Box-and-Whiskers (min/max), median | Figure legend Meth para 10 | P=0.4780                                   | Will add to figure legend if needed | t=0.7371                                             | Will add to figure legend if needed |
| Supplementary Fig. 4f | two-way ANOVA, Tukey's posthoc test    | Meth para 10    | 6/6                      | Mice per genotype, different time points           | Figure legend          | Box-and-Whiskers (min/max), median | Figure legend Meth para 10 | P=0.4635 (genotype) P<0.0001 (time)        | Will add to figure legend if needed | F(1,10)=0.58 (genotype) F(1,10)=138 (time)           | Will add to figure legend if needed |
| Supplementary Fig. 4h | multiple t-tests                       | Meth para 10    | 3/3<br>3/3               | Mice for each marker                               | Figure legend          | error bars are mean +/- SEM        | Figure legend Meth para 10 | P=0.7673 (CGRP) P=0.4675 (NF200)           | Will add to figure legend if needed | t=0.3166 (CGRP) t=0.0820 (NF200)                     | Will add to figure legend if needed |
| Supplementary Fig. 5b | unpaired t-test                        | Meth para 10    | 3/3                      | Mice per treatment                                 | Figure legend          | error bars are mean +/- SEM        | Figure legend Meth para 10 | P=0.0014                                   | Will add to figure legend if needed | t=7.897                                              | Will add to figure legend if needed |
| Supplementary Fig. 5c | two-way ANOVA, Bonferroni posthoc test | Methods para 10 | 6/6                      | Mice per treatment                                 | Figure legend          | Box-and-Whiskers (min/max), median | Methods para 10            | P=0.0128                                   | Will add to figure legend if needed | F(1,10) = 9.149                                      | Will add to figure legend if needed |
| +<br>- 5a             | unpaired t-test                        | Meth para 10    | 4,4                      | mice, 3 replicates for each mRNA                   | Will add to the legend | error bars are mean +/- SEM        | Meth para 10               | P=0.001                                    | Will add to the legend if needed    | t=5.791 df=6                                         | Will add to the legend if needed    |
| +<br>- 5b             | unpaired t-test                        | Meth para 10    | 3, 4                     | mice, 3 replicates for each mRNA                   | Will add to the legend | error bars are mean +/- SEM        | Meth para 10               | P=0.009                                    | Will add to the legend if needed    | t=4.072 df=5                                         | Will add to the legend if needed    |
| +<br>- 5c             | two-way ANOVA, Tukey's posthoc test    | Meth para 10    | 5, 6                     | mice per genotype, tested at different time points | Figure legend          | error bars are mean +/- SEM        | Meth para 10               | P = 0.0006 (time) P = 0.04 (genotype)      | Will add to the legend if needed    | F(4, 36) = 6.36 (time) F(1, 9) = 5.78 (genotype)     | Will add to the legend if needed    |
| +<br>- 5d             | two-way ANOVA, Tukey's posthoc test    | Meth para 10    | 5, 5                     | mice per genotype, tested at different time points | Figure legend          | error bars are mean +/- SEM        | Meth para 10               | P < 0.0001 (time) P = 0.06 (genotype)      | Will add to the legend if needed    | F(4, 32) = 13.74 (time) F(1, 8) = 4.65 (genotype)    | Will add to the legend if needed    |
| +<br>- 5e             | multiple t-tests                       | Meth para 10    | 5/5<br>5/5<br>4/4<br>5/5 | mice, 3 replicates for each mRNA                   | Figure legends         | error bars are mean +/- SEM        | Meth para 10               | P=0.17<br>P=0.01<br>P=0.096<br>P=0.90      | Will add to the legend if needed    | t=1.47<br>t=3.28<br>t=1.96<br>t=0.12                 | Will add to the legend if needed    |
| 5f                    | multiple t-tests                       | Meth para 10    | 4/4<br>4/4<br>4/4<br>4/4 | mice, 3 replicates for each mRNA                   | Figure legends         | error bars are mean +/- SEM        | Meth para 10               | P=0.05<br>P=0.77<br>P=0.81<br>P=0.34       | Will add to the legend if needed    | t=2.37<br>t=0.30<br>t=0.238<br>t=1.027               | Will add to the legend if needed    |
| Supplementary Fig. 6a | unpaired t-test                        | Meth para 10    | 3/3                      | mice, 3 replicates for each mRNA                   | Figure legends         | error bars are mean +/- SEM        | Meth para 10               | P=0.0003                                   | Will add to the legend if needed    | t=11.43 df=4                                         | Will add to the legend if needed    |
| Supplementary Fig. 6c | unpaired t-test                        | Meth para 10    | 7/7                      | Mice per genotype                                  | Figure legends         | error bars are mean +/- SEM        | Meth para 10               | P=0.3058                                   | Will add to the legend if needed    | t=1.070                                              | Will add to the legend if needed    |

|                       |      |         |  |  |         |         |         |  |                         |  |                         |
|-----------------------|------|---------|--|--|---------|---------|---------|--|-------------------------|--|-------------------------|
| Supplementary Fig. 6d | test | para 10 |  |  | legends | +/- SEM | para 10 |  | to the legend if needed |  | to the legend if needed |
|-----------------------|------|---------|--|--|---------|---------|---------|--|-------------------------|--|-------------------------|

|        |                        |                                         |              |                   |                                             |                                |                                    |              |                                               |                                  |                                                                  |                                  |
|--------|------------------------|-----------------------------------------|--------------|-------------------|---------------------------------------------|--------------------------------|------------------------------------|--------------|-----------------------------------------------|----------------------------------|------------------------------------------------------------------|----------------------------------|
| +<br>- | Supplementary Fig. 6e  | two-way ANOVA, Tukey's Posthoc          | Meth para 10 | 7/7               | Mice per genotype at different temperatures | Figure legends                 | error bars are mean +/- SEM        | Meth para 10 | P=0.4289 (genotype)<br>P<0.0001 (temperature) | Will add to the legend if need   | F (1, 12) = 0.6704 (genotype)<br>F (1, 24) = 130.6 (temperature) | Will add to the legend if need   |
|        | Supplementary Fig. 7   | multiple t-tests (unpaired, one-tailed) | Meth para 10 | 4/4               | rats, 4 replicates for each mRNA            | Will add to the legend         | Box-and-Whiskers (min/max), median | Meth para 10 | P=0.0106 (sham)<br>P=0.025 (injury)           | Will add to the legend if need   | t=3.099 (sham)<br>t=2.441 (injury)                               | Will add to the legend if needed |
|        | Supplementary Fig. 8   | multiple t-tests                        | Meth para 10 | 3, 3, 3           | mice, 3 replicates for each mRNA            | Will add to the legend if need | error bars are mean +/- SEM        | Meth para 10 | P=0.0002<br>P=0.00064<br>P=0.37 not detectabl | Will add to the legend if need   | t=11.77<br>t=9.58<br>t=1.0                                       | Will add to the legend if need   |
| +<br>- | 6b                     | one-way ANOVA, multiple comparison      | Meth para 10 | 4, 4, 4, 2        | mice, 4 sections per mouse                  | Figure legends                 | error bars are mean +/- SEM        | Meth para 10 | P< 0.0001                                     | Will add to the legend if needed | F=55.31                                                          | Will add to the legend if needed |
| +<br>- | 6c                     | two-way ANOVA                           | Meth para 10 | 3, 3              | mice, 4 sections per mouse                  | Figure legends                 | error bars are mean +/- SEM        | Meth para 10 | P < 0.0001 (genotype and injury)              | Will add to the legend if needed | F (1, 8) = 167.8 (genotype)<br>F (1, 8) = 476.4 (injury)         | Will add to the legend if needed |
| +<br>- | 6d                     | two-way ANOVA                           | Meth para 10 | 2, 4              | mice, 4 sections per mouse                  | Figure legends                 | error bars are mean +/- SEM        | Meth para 10 | P=0.15 (genotype)<br>P< 0.0001 (injury)       | Will add to the legend if needed | F (1, 8) = 2.516 (genotype)<br>F (1, 8) = 129.3 (injury)         | Will add to the legend if needed |
| +<br>- | 6e                     | two-way ANOVA                           | Meth para 10 | 3, 2, 3, 4        | mice, 4 sections per mouse                  | Figure legends                 | error bars are mean +/- SEM        | Meth para 10 | P=0.34 (genotype)<br>P=0.0001 (treatment)     | Will add to the legend if needed | F (1, 8) = 1.014 (genotype)<br>F (1, 8) = 49.68 (treatment)      | Will add to the legend if needed |
| +<br>- | 7k                     | two-way ANOVA                           | Meth para 10 | 4, 3              | mice, 4 sections per mouse                  | Figure legends                 | error bars are mean +/- SEM        | Meth para 10 | P=0.01 (genotype)<br>P=0.0001 (injury)        | Will add to the legend if needed | F (1, 10) = 9.98 (genotype)<br>F (1, 10) = 34.91 (injury)        | Will add to the legend if needed |
| +<br>- | Supplementary Fig. 12a | multiple t-tests                        | Meth para 10 | 3/4<br>3/4<br>3/3 | mice, 3 replicates for each mRNA            | Figure legends                 | error bars are mean +/- SEM        | Meth para 10 | P=0.015<br>P=0.02<br>P=0.004                  | Will add to the legend if needed | t=3.61<br>t=3.31<br>t=5.63                                       | Will add to the legend if needed |
| +<br>- | Supplementary Fig. 12b | multiple t-tests                        | Meth para 10 | 4/4<br>4/4<br>4/4 | mice, 3 replicates for each mRNA            | Figure legends                 | error bars are mean +/- SEM        | Meth para 10 | P=0.79<br>P=0.36<br>P=0.03                    | Will add to the legend if needed | t=0.27<br>t=0.97<br>t=2.75                                       | Will add to the legend if needed |

## }Representative figures

1. Are any representative images shown (including Western blots and immunohistochemistry/staining) in the paper?

If so, what figure(s)?

Yes, immunostaining and fluorescent in situ hybridization

Fig. 2a-d; Supplementary Fig. 1a; Supplementary Fig. 2a-d; Fig. 3a-e; Supplementary Fig. 4g; Supplementary Fig. 5a; Supplementary Fig. 6b; Fig. 6a; Supplementary Fig. 9a-d; Fig. 7a-j; Supplementary Fig. 10; Fig. 8a-c; Supplementary Fig. 11

2. For each representative image, is there a clear statement of how many times this experiment was successfully repeated and a discussion of any limitations in repeatability?

If so, where is this reported (section, paragraph #)?

Yes, we state in the methods section that each experiment was done in at least 3 animals. For each animal, at least three different images were taken.

Methods, paragraph 4 and 5

## }Statistics and general methods

1. Is there a justification of the sample size?  
If so, how was it justified?  
Where (section, paragraph #)?  
Even if no sample size calculation was performed, authors should report why the sample size is adequate to measure their effect size.
 

For the qRT-PCR experiments, the sample size was 3-4 animals per gene, the minimal number required for statistical analysis. For the behavior experiments, the sample size was 4-7 animals per group. This number is based on our previous experience using these tests and is the minimum sample size given the effect size required to obtain statically significant results.
  
2. Are statistical tests justified as appropriate for every figure?  
Where (section, paragraph #)?
 

Yes

  - a. If there is a section summarizing the statistical methods in the methods, is the statistical test for each experiment clearly defined?
 

Yes
  - b. Do the data meet the assumptions of the specific statistical test you chose (e.g. normality for a parametric test)?  
Where is this described (section, paragraph #)?
 

Yes, this is described in the last paragraph of the Methods section.
  - c. Is there any estimate of variance within each group of data?  
Is the variance similar between groups that are being statistically compared?  
Where is this described (section, paragraph #)?
 

No
  - d. Are tests specified as one- or two-sided?
 

All tests were two-sided
  - e. Are there adjustments for multiple comparisons?
 

Post-hoc analysis
  
3. Are criteria for excluding data points reported?  
Was this criterion established prior to data collection?  
Where is this described (section, paragraph #)?
 

No
  
4. Define the method of randomization used to assign subjects (or samples) to the experimental groups and to collect and process data.  
If no randomization was used, state so.  
Where does this appear (section, paragraph #)?
 

For behavioral experiments, animals were initially placed into one or two cages and allowed to free run for a few minutes. Next each animal was randomly picked up and placed into a separate cylinder before the behavior test. Although we wrote "All behavioral experiments were performed as previously reported", we are prepared to add this randomization method into our Method section if requested.
  
5. Is a statement of the extent to which investigator knew the group allocation during the experiment and in assessing outcome included?  
If no blinding was done, state so.  
Where (section, paragraph #)?
 

Investigators were always blinded to groups/genotypes as stated in the method section.

6. For experiments in live vertebrates, is a statement of compliance with ethical guidelines/regulations included?  
Where (section, paragraph #)?
- Yes, in the Methods section, paragraph 1.
7. Is the species of the animals used reported?  
Where (section, paragraph #)?
- Yes, in the Methods section, paragraph 1.
8. Is the strain of the animals (including background strains of KO/transgenic animals used) reported?  
Where (section, paragraph #)?
- No. All mice were on a BL6 background. We will add this information to the Methods section. The HA/LA rats were selected from Wistar-derived Sabra strain rats.
9. Is the sex of the animals/subjects used reported?  
Where (section, paragraph #)?
- Yes, in the method section paragraph 1
10. Is the age of the animals/subjects reported?  
Where (section, paragraph #)?
- No. All experiments were performed with young adult mice (11-14 week-old). We will add this information to the Methods section.
11. For animals housed in a vivarium, is the light/dark cycle reported?  
Where (section, paragraph #)?
- No. It was a typical 12-hour light/dark cycle. IF necessary, we will add this information to the method section.
12. For animals housed in a vivarium, is the housing group (i.e. number of animals per cage) reported?  
Where (section, paragraph #)?
- No. It was typically 1-5 animals per housing group. IF necessary, we will add this information to the method section.
13. For behavioral experiments, is the time of day reported (e.g. light or dark cycle)?  
Where (section, paragraph #)?
- Yes. All behavioral experiments were performed during the light cycle.  
Methods, paragraph 2
14. Is the previous history of the animals/subjects (e.g. prior drug administration, surgery, behavioral testing) reported?  
Where (section, paragraph #)?
- Yes, in Methods section, paragraph 2.
- a. If multiple behavioral tests were conducted in the same group of animals, is this reported?  
Where (section, paragraph #)?
- We wrote "All behavioral experiments were performed as performed as previously reported". Here, mice underwent repeated testing with von Frey filaments at different time points. Different baseline behavior was also tested in the same group of animals. We can add this information to the Methods section if needed.
15. If any animals/subjects were excluded from analysis, is this reported?  
Where (section, paragraph #)?
- No
- a. How were the criteria for exclusion defined?  
Where is this described (section, paragraph #)?

- b. Specify reasons for any discrepancy between the number of animals at the beginning and end of the study.

No discrepancy.

Where is this described (section, paragraph #)?

## }Reagents

1. Have antibodies been validated for use in the system under study (assay and species)?

Yes.

- a. Is antibody catalog number given?

No. We can add this information to the Methods section if necessary.

Where does this appear (section, paragraph #)?

- b. Where were the validation data reported (citation, supplementary information, Antibodypedia)?

The anti-CSF1 antibody did not detect any immunostaining signal in the sensory neurons of Adv-Cre; Csf1 fl/fl mice. Characteristics of the ATF3, NPY and NF200 antibody have been reported previously (Braz et al., J. Comp. Neurol. 2011 519:2648-57.)

Where does this appear (section, paragraph #)?

2. If cell lines were used to reflect the properties of a particular tissue or disease state, is their source identified?

No cell lines were used.

Where (section, paragraph #)?

- a. Were they recently authenticated?

Where is this information reported (section, paragraph #)?

## }Data deposition

Data deposition in a public repository is mandatory for:

- Protein, DNA and RNA sequences
- Macromolecular structures
- Crystallographic data for small molecules
- Microarray data

Deposition is strongly recommended for many other datasets for which structured public repositories exist; more details on our data policy are available [here](#). We encourage the provision of other source data in supplementary information or in unstructured repositories such as [Figshare](#) and [Dryad](#).

We encourage publication of Data Descriptors (see [Scientific Data](#)) to maximize data reuse.

1. Are accession codes for deposit dates provided?

No. Our RNA-Seq data were submitted to GEO: series entry number GSE66619. We will add this information to the Methods section.

Where (section, paragraph #)?

## }Computer code/software

Any custom algorithm/software that is central to the methods must be supplied by the authors in a usable and readable form for readers at the time of publication. However, referees may ask for this information at any time during the review process.

1. Identify all custom software or scripts that were required to conduct the study and where in the procedures each was used.

2. If computer code was used to generate results that are central to the paper's conclusions, include a statement in the Methods section under "**Code availability**" to indicate whether and how the code can be accessed. Include version information as necessary and any restrictions on availability.

## }Human subjects

1. Which IRB approved the protocol?

Where is this stated (section, paragraph #)?

2. Is demographic information on all subjects provided?

Where (section, paragraph #)?

3. Is the number of human subjects, their age and sex clearly defined?

Where (section, paragraph #)?

4. Are the inclusion and exclusion criteria (if any) clearly specified?

Where (section, paragraph #)?

5. How well were the groups matched?

Where is this information described (section, paragraph #)?

6. Is a statement included confirming that informed consent was obtained from all subjects?

Where (section, paragraph #)?

7. For publication of patient photos, is a statement included confirming that consent to publish was obtained?

Where (section, paragraph #)?

For papers reporting functional imaging (fMRI) results please ensure that these minimal reporting guidelines are met and that all this information is clearly provided in the methods:

1. Were any subjects scanned but then rejected for the analysis after the data was collected?

a. If yes, is the number rejected and reasons for rejection described?

Where (section, paragraph #)?

2. Is the number of blocks, trials or experimental units per session and/or subjects specified?

Where (section, paragraph #)?

3. Is the length of each trial and interval between trials specified?

4. Is a blocked, event-related, or mixed design being used? If applicable, please specify the block length or how the event-related or mixed design was optimized.

5. Is the task design clearly described?

Where (section, paragraph #)?

6. How was behavioral performance measured?

7. Is an ANOVA or factorial design being used?

8. For data acquisition, is a whole brain scan used?

If not, state area of acquisition.

a. How was this region determined?

9. Is the field strength (in Tesla) of the MRI system stated?

a. Is the pulse sequence type (gradient/spin echo, EPI/spiral) stated?

b. Are the field-of-view, matrix size, slice thickness, and TE/TR/flip angle clearly stated?

10. Are the software and specific parameters (model/functions, smoothing kernel size if applicable, etc.) used for data processing and pre-processing clearly stated?

11. Is the coordinate space for the anatomical/functional imaging data clearly defined as subject/native space or standardized stereotaxic space, e.g., original Talairach, MNI305, ICBM152, etc? Where (section, paragraph #)?
12. If there was data normalization/standardization to a specific space template, are the type of transformation (linear vs. nonlinear) used and image types being transformed clearly described? Where (section, paragraph #)?
13. How were anatomical locations determined, e.g., via an automated labeling algorithm (AAL), standardized coordinate database (Talairach daemon), probabilistic atlases, etc.?
14. Were any additional regressors (behavioral covariates, motion etc) used?
15. Is the contrast construction clearly defined?
16. Is a mixed/random effects or fixed inference used?
  - a. If fixed effects inference used, is this justified?
17. Were repeated measures used (multiple measurements per subject)?
  - a. If so, are the method to account for within subject correlation and the assumptions made about variance clearly stated?
18. If the threshold used for inference and visualization in figures varies, is this clearly stated?
19. Are statistical inferences corrected for multiple comparisons?
  - a. If not, is this labeled as uncorrected?
20. Are the results based on an ROI (region of interest) analysis?
  - a. If so, is the rationale clearly described?
  - b. How were the ROI's defined (functional vs anatomical localization)?
21. Is there correction for multiple comparisons within each voxel?
22. For cluster-wise significance, is the cluster-defining threshold and the corrected significance level defined?
